# Supplementary material for: Pyridine linked fluorene hybrid bipolar host for blue, green, and orange phosphorescent organic light-emitting diodes toward solution processing
Source: Royal Society of Chemistry journal article supplement (doi:10.1039/c7tc04339b), 2017-01-01
Supplement: c7tc04339b1.pdf [file c7tc04339b1.pdf]

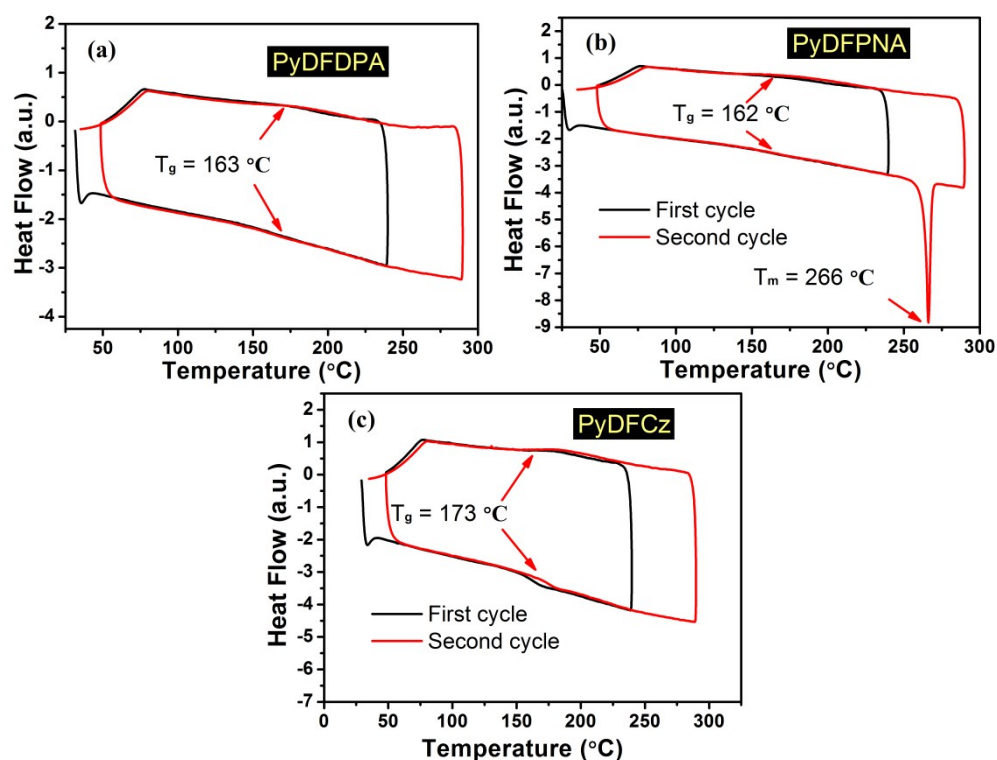

**Fig.S1.** The differential scanning calorimetry (DSC) curves of of PyDFDPA, PyDFPNA, and PyDFCz.

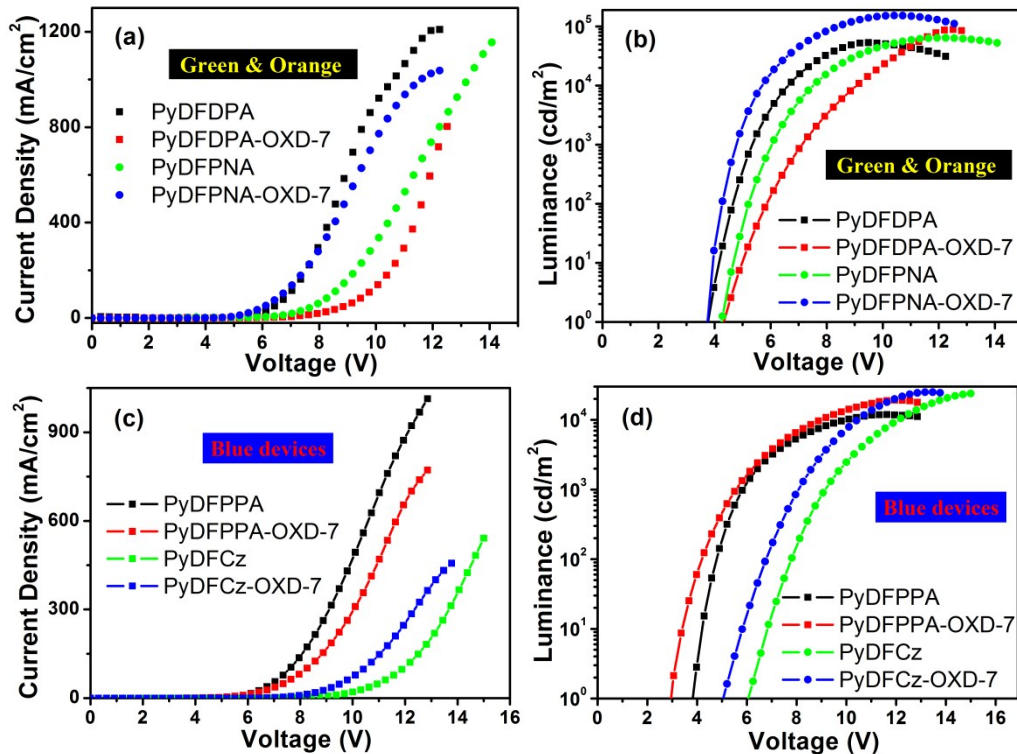

**Fig. S2.** Current density-voltage-luminance curves of the green, orange (a, b), and blue (c, d) OLEDs.

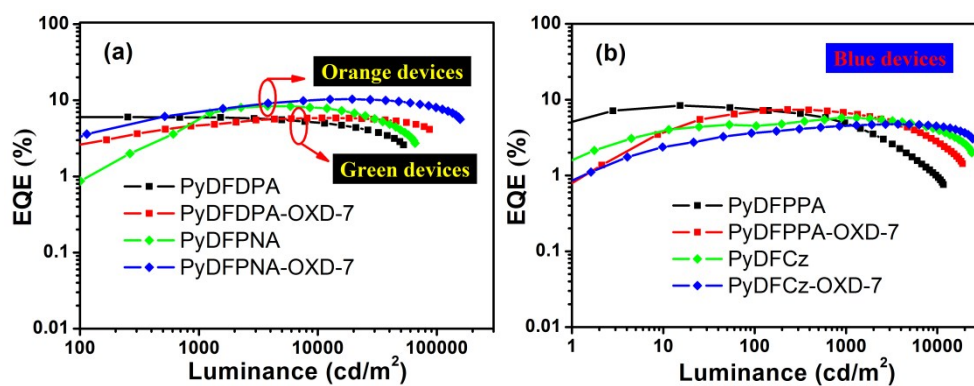

**Fig. S3.** EL efficiency versus luminance curves of the green, orange (a), and blue (b) OLEDs.

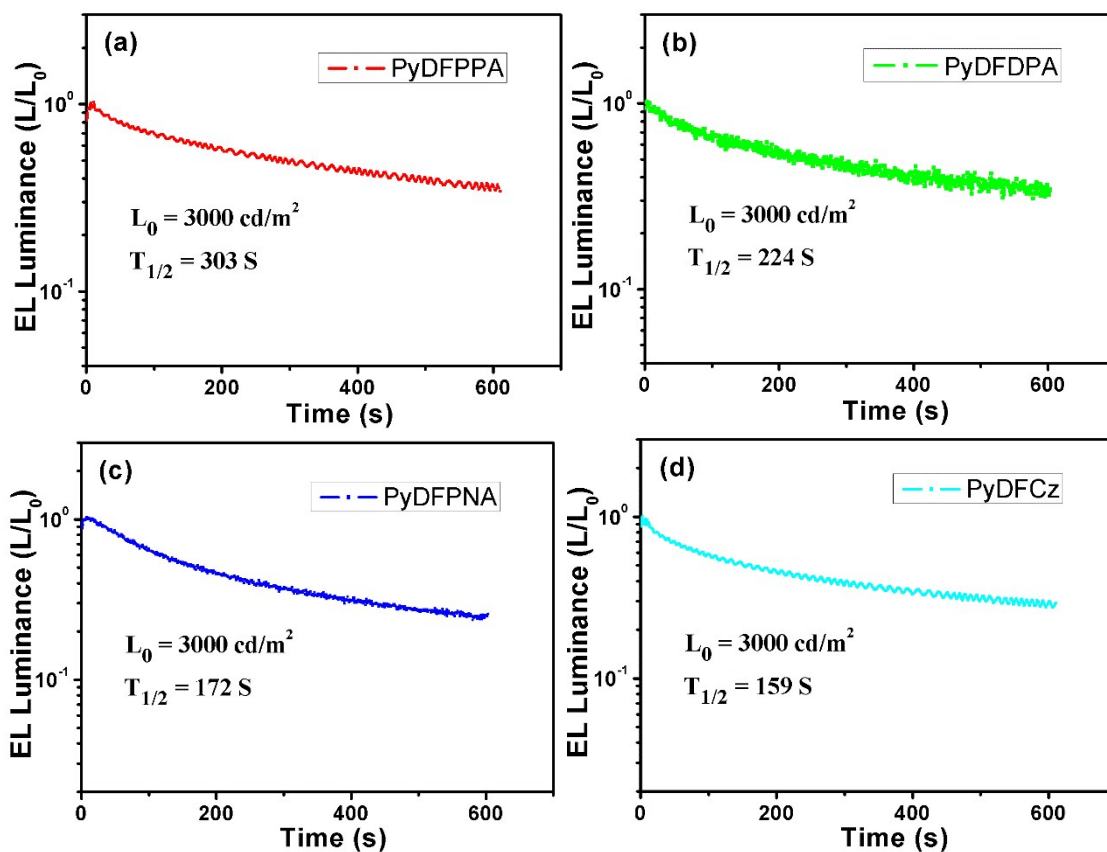

**Fig. S4.** Device operating lifetime of the blue, green, and orange phosphorescent devices based on PyDFPPA, PyDFDPA, PyDFPNA, and PyDFCz host at an initial luminance of 3000 cd m<sup>-2</sup> under constant current mode.
